# 1 Synergy of Quorum Quenching Enzyme and Quorum 2 Sensing Inhibitor in Inhibiting *P.aeruginosa* Quorum 3 Sensing

4 July Fong<sup>1+</sup>, Chaodong Zhang<sup>2+</sup>, Renliang Yang<sup>1,3</sup>, Zhao Zhi Boo<sup>1,3</sup>, Soon Keat Tan<sup>4</sup>,  
5 Thomas E. Nielsen<sup>5,6</sup>, Michael Givskov<sup>5,6</sup>, Bin Wu<sup>1,3</sup>, Haibin Su<sup>7\*</sup>, Liang Yang<sup>1,5\*</sup>

6 <sup>1</sup>School of Biological Sciences, Nanyang Technological University, 60 Nanyang Drive, Singapore 637551

7 <sup>2</sup>Nanyang Environment and Water Research Institute (NEWRI), Interdisciplinary Graduate School,  
8 Nanyang Technological University, 50 Nanyang Avenue, Singapore 639798

9 <sup>3</sup>NTU Institute of Structural Biology, Nanyang Technological University, EMB 06-01, 59 Nanyang Drive,  
10 Singapore 636921

11 <sup>4</sup>School of Civil and Environmental Engineering, Nanyang Technological University, 50 Nanyang Ave,  
12 Singapore 639798

13 <sup>5</sup>Singapore Centre for Environmental Life Sciences Engineering (SCELSE), Nanyang Technological  
14 University, 60 Nanyang Drive, Singapore 637551

15 <sup>6</sup>Costerton Biofilm Center, Department of Immunology and Microbiology, University of Copenhagen,  
16 2200 København N, Denmark

17 <sup>7</sup>School of Materials Science and Engineering, Nanyang Technological University, 50 Nanyang Avenue,  
18 Singapore 639798

19 \*Address correspondence to Haibin Su, [HBSu@ntu.edu.sg](mailto:HBSu@ntu.edu.sg) and Liang Yang, [yangliang@ntu.edu.sg](mailto:yangliang@ntu.edu.sg).

20 + J.F. and C.Z. contributed equally to this work.

21

## 22 ABSTRACT

23 The threat of antibiotic resistant bacteria has called for alternative antimicrobial strategies  
24 that would mitigate the increase of classical resistance mechanism. Many bacteria employ  
25 quorum sensing (QS) to govern the production of virulence genes and formation of drug-  
26 resistance biofilms. Blocking QS mechanisms have proven to be a functional alternative  
27 to conventional antibiotic control of infections. The concepts of quorum sensing  
28 inhibitors (QSI) and quorum quenching enzymes (QQ) have been investigated separately.  
29 In this study however, we simulated the synergistic effect of QQ and QSI in blocking  
30 bacterial QS. This effect was validated by experiments using AiiA and G1 as QQ and  
31 QSI respectively on *Pseudomonas aeruginosa* LasR/I and RhlR/I QS circuits. The  
32 combination of a QQ and a QSI almost completely blocked the *P. aeruginosa* QS *las* and

33 *rhl* system. Our findings provided a potential application strategy for bacterial QS  
34 disruption.

## 35 **Introduction**

36 The emerging threat of antibiotic resistant bacterial pathogens has called for alternative  
37 strategies that could minimize the development of resistance mechanism. One such  
38 strategy is to interfere with the signaling pathways governing the social behaviors<sup>1</sup>.  
39 Microbial organisms exhibit social behaviors and communicate with each other through  
40 quorum sensing (QS)<sup>2-4</sup>. By synthesizing small signal molecules, they respond  
41 collectively to regulate expression of virulence factors , biofilm development, secondary  
42 metabolite production, interactions with host and other microbes in a population-density  
43 manner<sup>5</sup>. As QS is involved in bacterial behaviors in particular those causing diseases,  
44 targeting QS mechanisms has been put forward as an attractive approach to conventional  
45 infection control<sup>1</sup>.

46 Acylhomoserine lactone (AHL)-based QS signals are found in more than 70 bacterial  
47 species, in which many of them are pathogens<sup>3,6</sup>. In most cases, the structures of the  
48 AHLs are conserved with a homoserine lactone (HSL) ring connected to an acyl group  
49 with different chain length ( $n = 4-16$ )<sup>5,7</sup>. There are two AHL- mediated QS systems in the  
50 opportunistic pathogen *Pseudomonas aeruginosa*, which comprise the Lux homologues  
51 LasRI and RhlRI, respectively. LasRI and RhlRI function in the hierarchical manner in  
52 controlling the gene expression. LasI and RhlI are responsible for the synthesis of *N*-(3-  
53 oxododecanoyl) homoserine lactone (3-oxo-C12-HSL) and *N*-butanoylhomoserine  
54 lactone (C4-HSL) respectively, while the LasR and RhlR function as receptors for 3-oxo-  
55 C12-HSL and C4-HSL and subsequently activate gene expression of QS target genes<sup>8-10</sup>.

56 On top of that, there is also third signaling molecule, “pseudomonas quinolone signal”  
57 (PQS) which intertwined between the *las* and *rhl* systems<sup>11</sup>. QS defective *P. aeruginosa*  
58 mutants have much reduced virulence as compared to the wild-type strain and unable to  
59 establish infections in several animal models<sup>1,12,13</sup>.

60 The concept of QS disruption encompasses not just medicine and healthcare settings,  
61 but also membrane bioreactor, aquaculture and crop production<sup>5,14</sup>. It could be achieved  
62 by interfering with the QS signaling pathways (signal generator or receptor), or  
63 intercepting with the signal molecules (AHL)<sup>15-17</sup>. Enzymes that inactivate QS signals are  
64 called quorum quenchers (QQ), while chemicals that disrupt the QS pathways and reduce  
65 the expression of QS-controlled genes are called quorum sensing inhibitors (QSI)<sup>5</sup>. The  
66 first study on how quorum quenching enzyme could be used to control bacterial  
67 infections was demonstrated by Dong et al.<sup>18</sup>. The enzyme encoded by *aiiA* gene isolated  
68 from Gram-positive *Bacillus* species is capable of inactivating AHL signals through  
69 hydrolysis of the ester bond of the homoserine lactone ring and quench the QS signaling.  
70 It was proposed that the AHL-lactonase (AiiA) paralyzes the QS signals and virulence  
71 factors production, hence allows the host defense mechanisms to halt and clear the  
72 bacterial infection<sup>19</sup>.

73 Mathematical modeling has been a useful tool to answer basic and conceptual research  
74 questions. In the last decade, mathematical modeling of QS has provided understanding  
75 to key components of the QS networks<sup>20</sup>. It has been used to examine *P. aeruginosa*  
76 LasR/I circuit and predict the biochemical switch between two steady states of system  
77 (low and high levels of signal perception) and QS response to colony size and cell  
78 density<sup>21</sup>. In another study, Magnus et al. included both LasR/I and RhIR/I circuits of *P.*

79 *aeruginosa* in their model. Their results suggested Vfr increases the affinity between  
80 LasR-AHL dimer and LasR promoter, which was supported by experiments showing that  
81 Vfr was important at initial but not later stages of QS induction<sup>22</sup>. Goryachev et al.  
82 analyzed *Vibrio fischeri* QS and found that dimerization of LuxR-AHL is important for  
83 the stability of QS network<sup>23</sup>. Weber et al. considered individual cell heterogeneity and  
84 concluded that in *Vibrio fischeri* QS network, LuxR expression noise decreases  
85 autoinducer turning on threshold of single cell but slows down the population level QS  
86 induction<sup>24</sup>. Altogether, the models developed in these studies provide basic  
87 understanding of QS networks utilizing LuxIR regulatory system and its homologues,  
88 which are identified in many Gram-negative bacteria<sup>25,26</sup>.

89 In this study, we explored the concept of combining a QQ enzyme and a QSI  
90 compound to disrupt AHL signaling and signal reception capacities, and reduce the  
91 pathogenicity of *P. aeruginosa*. The QS network in *P. aeruginosa* is highly adaptable and  
92 capable of responding to the environmental stress conditions<sup>27,28</sup>, hence combinational  
93 therapy could provide multiple points of attack to increase bacteria coverage<sup>29</sup>. The two  
94 classes of QS disrupting agents have been studied independently, each with their own  
95 advantages and drawbacks. Small molecules as QSIs have well-known chemical  
96 structures, which in turn would allow structural activity and relationship (SAR) study and  
97 biological activities modification (ie. pharmacodynamics and pharmacokinetics  
98 properties). The molecules can also diffuse into the cells and target the receptors, in  
99 contrast to QQ enzymes that act extracellularly to degrade AHLs<sup>30</sup>. Because of their  
100 distinct molecular structures and functional mechanisms, it would be interesting to  
101 explore the possible synergistic effect of a QQ enzyme and a QSI molecule.

## 102 **Results**

### 103 **Mathematical modeling shows synergistic effects between QQ enzyme and QSI on**

104 **LasR/I circuit.** In our study, we chose QQ enzyme AiiA in combination with G1, a small  
105 molecule of QSI which binds to LasR and RhIR<sup>31</sup> as our models. When only a QQ  
106 enzyme (AiiA) was present, simulation results showed a distinct on and off states (Fig.  
107 1A).  $\eta(\text{QQ})$  represents the AHL degradation rate by the QQ enzyme. When the QQ  
108 enzyme concentration is low and  $\eta(\text{QQ})$  is small, the stationary AHL concentration is  
109 high. However, when  $\eta(\text{QQ})$  exceeds a threshold ( $2.8 \times 10^{-4} \text{s}^{-1}$ ), the stationary AHL  
110 concentration suddenly decreases to an insignificant value. Similar switching behaviors  
111 have been observed in the simulation response curves of QS components to population  
112 size<sup>32</sup>, cell volume fraction<sup>21</sup>, or to external AHL concentration<sup>33</sup>. Switching behaviors of  
113 QS networks have also been observed experimentally at individual cell level<sup>34,35</sup>.

114 When only the QSI was present, similar switching behavior was observed and shown in  
115 Fig. 1B. As the QSI and AHL bind to LasR competitively, the inhibiting effect of QSI is  
116 less efficient. Irreversible QSIs like halogenated furanones<sup>36</sup> that induce degradation of  
117 the LasR receptor protein can inhibit QS more effectively (simulation data not shown).  
118 When combined, QQ and QSI can enhance the inhibiting effects of each other (Fig. 1C  
119 and D). 0.5  $\mu\text{M}$  QSI alone has very little effect, but it can reduce the minimum QQ rate  
120 required to turn off QS up to 4 folds. Similarly, adding small amount of QQ ( $\eta(\text{QQ}) =$   
121  $0.5 \times 10^{-4} \text{s}^{-1}$ ) can reduce the minimum QSI concentration required to turn off QS up to  
122 20 folds. The stationary AHL concentration decreased as compared to single treatment  
123 using QSI.

124 3D plot of stationary AHL to  $\eta(QQ)$  and QSI is shown in Fig. 2A. A clear boundary  
125 between QS on and off states was observed, which is shown in 3B. This boundary curve  
126 is “U”-shaped which means QQ and QSI have a synergistic effect in inhibiting QS<sup>37</sup>.  
127  $\eta(QQ)$  is assumed to be proportional to QQ in this simulation. However, if another  
128 enzymatic dynamics such as a Michaelis–Menten equation<sup>38</sup> were used,  $\eta'(QQ) > 0$  and  
129  $\eta''(QQ) \leq 0$  are satisfied. If we change the  $\eta(QQ)$  axis to QQ in Fig. 2B, the curve will  
130 still be “U”-shaped and the conclusions of the simulation will remain the same.

131 **Synergistic effects on QS bioreporter strains.** To validate the mathematical modeling  
132 results, the synergistic effects of AiiA enzyme and G1 were tested using the *P.*  
133 *aeruginosa* QS bioreporter strain PAO1-*lasB-gfp*<sup>39</sup>. The elastase encoding *lasB* gene is  
134 controlled by LasR and any induction in the fluorescence signals would indicate the  
135 presence of 3-oxo-C12-HSL<sup>40</sup>. The compounds were tested at different concentration  
136 gradient to generate dose-dependent curves and calculate the IC<sub>50</sub> values, which represent  
137 half of the concentration required to inhibit the gene expression. Most importantly, in  
138 support of our non-growth inhibitory antimicrobial principle<sup>1</sup>, neither compounds nor  
139 enzymes affect the growth rate of the bacteria (Supplementary Figure S1). The reduction  
140 of the GFP output was indeed due to the effect of compounds in reducing expression of  
141 the QS controlled *lasB-gfp* gene. The growth measured as OD<sub>600</sub> was used as control of  
142 our non-growth inhibitory concept.

143 Both G1 and AiiA inhibited *lasB-gfp* expression in dose-dependent manner with IC<sub>50</sub>  
144 values of  $13.33 \pm 2.37$   $\mu$ M and  $4.58 \pm 1.05$   $\mu$ M respectively. Promising results were  
145 obtained in combinational therapy of AiiA and G1, where the IC<sub>50</sub> values were  
146 significantly reduced to low micromolar range. IC<sub>50</sub> values calculated for G1 when

147 combined with 32  $\mu\text{g}/\text{mL}$  of AiiA was  $6.98 \pm 1.98$  nM and  $58.65 \pm 19$  nM with 16  $\mu\text{g}/\text{mL}$   
148 of AiiA. The *lasB-gfp* readings were much lower in the combination treatment as  
149 compared to single treatments (Fig. 3).

150 Next, we investigated if the synergistic effect would also affect the PQS system, the  
151 third intercellular signaling mechanism of *P. aeruginosa* that regulates numerous  
152 virulence factors, including those involved in iron scavenging and apoptosis of host  
153 cells<sup>41,42</sup>. PQS is under positive regulation of LasR and negative regulation of RhlR<sup>41,43</sup>.  
154 PQS has also been detected in the lung of cystic fibrosis patients<sup>44</sup> and reported to  
155 suppress host innate immune responses through nuclear factor- $\kappa\text{B}$  pathway<sup>45</sup>.

156 For this experiment, we tested the compounds against *pqsA-gfp* reporter fusion. The  
157 biosynthesis of PQS and other classes of alkyl quinolones requires genes encoded by the  
158 *pqsABCDE* and *phnAB* operons<sup>46</sup>. Interestingly, the AiiA didn't show much inhibition  
159 effects on *pqsA-gfp* with  $\text{IC}_{50}$  values calculated to be  $15.58 \pm 0.17$   $\mu\text{M}$ . Combination  
160 treatment between G1 and AiiA significantly reduced the *pqsA-gfp* expression to  $\text{IC}_{50}$   
161 values of  $0.63 \pm 0.06$   $\mu\text{M}$  (Fig. 4).

162 **G1 has different affinity to the LasR and RhlR proteins.** We next examined the  
163 synergistic effects on the *rhl* system, which regulates many QS-dependent virulence  
164 factors once activated upon formation of RhlR-C4-HSL<sup>10,47</sup>. The AiiA has been  
165 experimentally shown to degrade C4-HSL<sup>48</sup>. Our previous experiments also showed that  
166 G1 was able to inhibit *rhl* system more effectively in *P. aeruginosa lasR* mutant but not  
167 the *rhl* system in the PAO1 wildtype<sup>31</sup>. We thus hypothesized that G1 has different  
168 binding affinity to LasR than RhlR in the PAO1 wildtype and its intracellular  
169 concentration is not high enough to repress both LasR and RhlR simultaneously.

170 To test this hypothesis, we examined the competitive binding efficacy of G1 with 3-  
171 oxo-C12-HSL and C4-HSL using a QS deficient *P. aeruginosa*  $\Delta lasI\Delta rhII$  double mutant  
172 which can respond to the addition of exogenous AHLs (3-oxo-C12-HSL and C4-HSL  
173 respectively). In this setting, only one QS system is activated at one time. The reporter  
174 strains showed dose-dependent curves when supplemented with different concentration  
175 of 3-oxo-C12-HSL and C4-HSL (Fig. 5A and 5C). When 50  $\mu$ M of G1 was added  
176 together with 3-oxo-C12-HSL, we only observed reduction in *lasB-gfp* as compared to  
177 the control when concentration of 3-oxo-C12-HSL is below 1.25  $\mu$ M. However, G1 was  
178 able to reduce *rhIA-gfp* expression with all the tested C4-HSL concentrations (up to 10  
179  $\mu$ M) (Fig. 5B and 5D). Thus we suggest that G1 has a higher affinity to the RhlR than the  
180 LasR. However because most of the intracellular G1 was consumed due to LasR  
181 abundance, hence its effect to inhibit *rhl* QS in the PAO1 wildtype was abolished due to  
182 the earlier induction of *las* QS than the *rhl* QS during growth.

183 **AiiA enhances inhibition of G1 on *rhl* QS system in *P. aeruginosa*.** Since AiiA has a  
184 strong synergy with G1 in inhibiting *las* system, we hypothesized that AiiA is able to  
185 have a synergistic effect with G1 in inhibiting the *rhl* system due to the fact that low  
186 abundance of LasR protein will ‘consume’ less amounts of G1 in the presence of AiiA,  
187 hence more G1 molecules could bind with RhlR. For this experiment, we used PAO1-  
188 *rhIA-gfp* bioreporter strain to study the synergistic effects of both compounds. The *rhIA* is  
189 the first gene of the *rhlAB* operon that codes for the rhamnolipid biosynthesis<sup>47</sup>. We  
190 observed similar findings where the *rhIA-gfp* activity was highly suppressed in the  
191 combination treatment (Fig. 6A-C). IC<sub>50</sub> values calculated for the combination treatment  
192 between G1 and AiiA for the *rhIA-gfp* expression is  $17.7 \pm 1.4$  nM, much lower than the



193 single treatment of QSI and QQ ( $IC_{50}$  for G1 =  $3.65 \pm 0.95 \mu\text{M}$  and AiiA =  $17.79 \pm 1.77$   
194  $\mu\text{M}$ ).

195 A strong synergistic effect was observed from combination of AiiA and G1, thus we  
196 were interested to investigate if the synergistic effects could reduce the virulence of *P.*  
197 *aeruginosa*. We decided to test the rhamnolipid production, as it is one of the key QS  
198 regulated virulent factors in the early stages of infection. Rhamnolipid promotes  
199 infiltration of respiratory epithelia cells<sup>49</sup> and promote rapid necrotic killing of  
200 polymorphonuclear (PMNs) leukocytes<sup>50</sup>. Rhamnolipid is also critical in each stage of  
201 biofilm formation and contribute to the structure of biofilms<sup>51,52</sup>.

202 In the rhamnolipid assay, overnight culture of PAO1 was adjusted to  $OD_{600}$  0.01 and  
203 grown in the presence of AiiA, G1 and combination of AiiA and G1 for 18 hours. The  
204 rhamnolipid was then extracted and quantified using the orcinol assay<sup>53</sup>. Treatment with  
205 AiiA alone didn't fully decrease rhamnolipid production. However, when combined with  
206 G1, the rhamnolipid production was almost diminished to similar level of QS defective  
207  $\Delta lasI\Delta rhII$  mutant (Fig. 6D). The findings correlate well with the results obtained from  
208 inhibition of *rhlA-gfp* bioreporter strain. The experimental results showed promising  
209 application of QQ and QSI in reducing virulence factors associated with host infection.

210

## 211 **Discussion**

212 Over the years, the emergence of multidrug-resistant bacteria and shortage of new  
213 antibiotics have been seen as critical issues and greatest threat to human health.  
214 Antivirulence approach has been long considered as alternatives in controlling the  
215 pathogenicity and reducing the resistance development<sup>1</sup>. In this study, we first reported

216 the synergistic activities of quorum quenching (QQ) enzyme and quorum sensing (QS)  
217 inhibitors in inhibiting *P. aeruginosa* LasR/I circuit, one of the important QS regulators.  
218 The two classes of compounds intercept QS in different mechanisms, and thus it is  
219 interesting to study the synergistic effects. Here, we use mathematical modeling of *P.*  
220 *aeruginosa* LasR/I QS network in batch culture to study whether QQ and QSI have  
221 synergistic, antagonist, or additive effects in quenching QS.

222 Simulation results show that very large  $\eta(\text{QQ})$  or QSI concentration was needed to  
223 inhibit QS. When combined, we observed strong synergistic effects between QQ and  
224 QSI. Interestingly, switching of QS circuit in the simulations was not observed in  
225 experiments. This might be due to simplification of the mathematical model, which  
226 assumes every cell is homogeneous and synchronized. In the single-cell study of QS  
227 signaling in *V. fischeri*, switching behaviour was observed while tracking single cells but  
228 the population level fluorescence was a graded response<sup>34</sup>. This could also be the case of  
229 lactose utilization network, where switching was observed in single cell but not at  
230 population level<sup>54</sup>.

231 The experimental results showed promising application of QQ and QSI based on  
232 different bioreporter assays. The AHL-dependent QS system has been an attractive target  
233 to control bacterial pathogenicity as it controls wide range of virulence gene expression.  
234 The AiiA enzyme has been reported to show high specificity and preference towards  
235 different signal molecules (acyl chain length and substitution)<sup>48</sup> and demonstrated to  
236 reduce the concentration of 3-oxo-C12-HSL based on our HPLC analysis (Supplementary  
237 Figure S2). In some cases, the degradation of QS signal alone is not sufficient to  
238 completely diminish and block the QS activities<sup>30</sup>. AiiA could abolish and effectively

239 quench the AHL signal molecules, however it was surprising to see its much lesser effect  
240 on the PQS system, which was also under *las* regulation. Combination treatment with G1  
241 resulted in significant reduction of *lasB*, *pqsA*, and *rhlA-gfp* expression as compared to  
242 single treatment of both AiiA and G1. Our work demonstrated that combining two classes  
243 of QSI and QQ could provide multiple points of attacks and efficient blockade of QS-  
244 mediated signaling pathways.

245 Although LasR regulator has long been considered essential for full virulence of *P.*  
246 *aeruginosa*<sup>55</sup>, loss of function *lasR* mutants occur frequently in the natural environment<sup>56</sup>  
247 and also cystis fibrosis patients<sup>57</sup> and individuals suffering from pneumonia and wound  
248 infections<sup>58</sup>. In the *lasR* mutants, the QS-regulated virulence factors continue to be  
249 expressed. There has also been reports that the *rhl* system could override the hierarchy of  
250 QS network in a non-functional *las* system<sup>59</sup>. Recent studies also showed that RhlR plays  
251 critical roles as QS regulator using *Drosophila melanogaster* oral infection model<sup>60</sup> and  
252 controls pathogenesis and biofilm development<sup>61</sup>.

253 In our previous study, G1 has been shown to interact and compete with AHL to inhibit  
254 LasR in *P. aeruginosa*<sup>31</sup>. In *P. aeruginosa* PAO1 strain, where both *las* and *rhl* circuits  
255 exist, G1 could only inhibit *las* system but cannot inhibit *rhl* system. However, when  
256 *lasR* was mutated, G1 can effectively inhibit *rhl* system. In our competitive binding assay  
257 using bioreporter strains, we demonstrated that QSIs might have different affinity to the  
258 QS receptor proteins. G1 can inhibit *lasB-gfp* expression only when concentration of 3-  
259 oxo-C12-HSL is smaller than 1.25  $\mu$ M. However, the inhibition effect of G1 to *rhlA-gfp*  
260 was still significant even when the concentration of C4-HSL is 10  $\mu$ M. We also observed  
261 the transcription rates of *las* system is activated first than that of *rhl*. The results explain

262 that despite of its higher binding affinity to RhlR, G1 would still bind to LasR because  
263 the *las* system is activated first in PAO1. But in the case of *lasR* mutant, G1 has higher  
264 competitiveness to C4-BHL and could inhibit *rhl* system effectively.

265 The results also suggested why AiiA could enhance the inhibition effects of G1 on *rhl*  
266 system, as shown by our experimental data. Assuming intracellular concentration of G1 is  
267 constant, G1 would have to competitively bind to both LasR and RhlR. In this case,  
268 addition of AiiA to quench both 3-oxo-C12-HSL and C4-HSL resulted in lower  
269 abundance of LasR and therefore G1 can specifically bind to inhibit RhlR. Thus  
270 combination of QQ and QSIs might not only enhanced the efficacy of QSIs, but also  
271 expand the targeting systems of QSIs as many bacteria have more than one *lux* QS  
272 systems.

273 In conclusion, the synergistic effects of QQ enzyme and QSI compound have been  
274 demonstrated *in vitro* in this study. Mathematical modeling showed enhanced QS  
275 inhibiting effects on AHL concentration when QQ enzyme (AiiA) and QSI (G1) were  
276 applied together. We have also provided better understanding and elucidated QS network  
277 interaction with G1 in this work. The implication of our study represents a novel  
278 approach of utilizing QS-interfering compounds to impede virulence and block  
279 pathogenesis. Future work is aiming to evaluate the effectiveness of the combined  
280 treatments *in vivo*.

281

## 282 **Materials and Methods**

283 **General information.** All chemicals were purchased from Sigma Aldrich and used  
284 without further purification. G1 was purchased from TimTec LLC (Newark, DE).

285 Bacteria were grown in Luria-Bertani (LB) broth (1% tryptone, 0.5% yeast extract, and  
286 0.5% NaCl). Media used for biological assay was ABTGC (AB minimal medium  
287 supplemented with 0.2% glucose and 0.2% casamino acids)<sup>62</sup>. Bacterial strains used in  
288 this study are shown in Table 1.

| Strains                                                             | Relevant genotype and/or characteristics                                                               |
|---------------------------------------------------------------------|--------------------------------------------------------------------------------------------------------|
| PAO1                                                                | <i>Pseudomonas aeruginosa</i> wild type <sup>12</sup>                                                  |
| PAO1- <i>gfp</i>                                                    | GFP-tagged PAO1 <sup>63</sup>                                                                          |
| PAO1- <i>lasB-gfp</i>                                               | PAO1 containing <i>lasB-gfp</i> (ASV) reporter fusion <sup>12</sup>                                    |
| PAO1- <i>pqsA-gfp</i>                                               | PAO1 containing <i>pqsA-gfp</i> (ASV) reporter fusion <sup>63</sup>                                    |
| PAO1- <i>rhlA-gfp</i>                                               | PAO1 containing <i>rhlA-gfp</i> (ASV) reporter fusion <sup>63</sup>                                    |
| PAO1 $\Delta$ <i>lasI</i> $\Delta$ <i>rhlI</i>                      | PAO1 QS deficient <i>lasI</i> and <i>rhlI</i> double mutant <sup>64</sup>                              |
| PAO1 $\Delta$ <i>lasI</i> $\Delta$ <i>rhlI</i> -<br><i>lasB-gfp</i> | PAO1 <i>lasI</i> and <i>rhlI</i> mutant containing <i>lasB-gfp</i> (ASV) reporter fusion <sup>65</sup> |
| PAO1 $\Delta$ <i>lasI</i> $\Delta$ <i>rhlI</i> -<br><i>rhlA-gfp</i> | PAO1 <i>lasI</i> and <i>rhlI</i> mutant containing <i>rhlA-gfp</i> (ASV) reporter fusion <sup>65</sup> |

289 **Table 1.** Bacterial strains used in this study

290 **Expression and purification of QQ enzyme AiiA.** The gene coding for AiiA was  
291 cloned into pET-47b(+) vector (BamHI-HindIII sites). The expression vector was  
292 transformed into *E. coli* BL21(DE3) competent cells (New England Biolabs, USA). The  
293 cells were grown in 2L of LB media supplied with 35 mg/L Kanamycin at 37°C. The  
294 expression of the protein was induced with 0.5 mM of Isopropyl  $\beta$ -D-1-  
295 thiogalactopyranoside (IPTG) when OD<sub>600</sub> reached 0.6. The cells were grown for  
296 overnight at 18°C. The harvested cells were resuspended in 50 mL of lysis buffer (50 mM  
297 Tris-HCl, pH 8.0, 150 mM NaCl, 0.05% (v/v) CHAPS, 10 % (v/v) glycerol) and lysed by

298 passing the homogenized cells through an Emulsiflex-C3 (Avestin, USA) high-pressure  
299 apparatus at 15,000 psi three times. The cell lysate was centrifuged at 25,000 g for 25  
300 min. The supernatant was then applied to Ni-NTA gravity column (Bio-rad) equilibrated  
301 with lysis buffer. After extensive washing with lysis buffer, the bound proteins were  
302 eluted with lysis buffer containing increasing concentration of imidazole (0 - 300 mM).  
303 The eluted fractions were analyzed with 15% of SDS-PAGE and fractions containing the  
304 desired protein were pooled and dialyzed against lysis buffer. The final concentration of  
305 the protein was measured using Bradford Assay.

306 **Enzymatic assay of AiiA.** The 3-oxo-C12-HSL hydrolysis activity of AiiA was tested  
307 with 500  $\mu$ M 3-oxo-C12-HSL, 30  $\mu$ M AiiA in reaction buffer (20 mM Tris-HCl, 150 mM  
308 NaCl, pH 8.0). After 30 min of reaction at 30°C, the reaction mixture was monitored at  
309 215 nm by analytic C18 reverse phase HPLC column (Jupitar, 5 $\mu$ , 300Å, 250x4.6 mm)  
310 with a flow rate of 0.5 mL/min (Gradient: 0-100% buffer B (90% acetonitrile, 10% H<sub>2</sub>O,  
311 0.05% TFA) in buffer A (100% H<sub>2</sub>O, 0.05% TFA) for 50 min).

312 **Model of LasR/I circuit.** The models in this study simulated batch cultures according to  
313 the experimental setup. The LasR/I QS circuit of *P. aeruginosa* is shown in Fig. 7. QSI  
314 binds to LasR similarly as AHL, but in this case only AHL can stabilize the LasR<sup>66</sup>. Since  
315 our focus of the present study was whether QQ enzyme and QSI have synergistic effect  
316 in inhibiting QS, some complex features in the QS network were simplified to make the  
317 model easier to implement and reduce computational cost. For instance, the interactions  
318 of LasR/I QS circuits with other cellular components, such as the binding of 3-oxo-C12-  
319 HSL to RhlR<sup>21</sup> were not included in the network studied in this work. Both heterogeneity  
320 and asynchronization of cells were beyond the scope of the modeling in this work. The

321 final component concentrations of cells in batch culture were adapted in the computation  
 322 of AHL concentration. As the response time of QS switching is much faster than the time  
 323 required for culture growth<sup>34</sup>, the final component concentrations can be approximated by  
 324 the stationary concentrations with the final cell volume fraction  $\rho$ . The AHL  
 325 concentration was considered to be homogeneous inside and outside cells due to its large  
 326 diffusion coefficient<sup>67</sup>.  $V_{fr}$  was assumed to be some large enough constant since it is  
 327 normally expressed in experimental strains of this study. QSI concentration was taken as  
 328 a constant considering its relative big value. A maximum concentration of AHL  $A_{max}$   
 329 was set in the model to avoid very large concentrations of components caused by the  
 330 accumulation of stable AHL in batch cultures<sup>68</sup>. The reactions of QS network are shown  
 331 in Table 2. QQ enzyme and QSI are written as  $Q_Q$  and  $Q_I$  to avoid confusion when  
 332 necessary.

| Reaction                    | Description              | Rate                                                                                               |
|-----------------------------|--------------------------|----------------------------------------------------------------------------------------------------|
| $I \rightarrow I + A$       | Production of A          | $\frac{V_A I}{K_A + I}$                                                                            |
| $A \rightarrow \text{null}$ | Natural decay of A       | $d_A A$                                                                                            |
| $R + A \rightarrow P$       | Combination of R and A   | $k_{RA} R A$                                                                                       |
| $P \rightarrow R + A$       | Dissociation of P        | $d_P P$                                                                                            |
| $R \rightarrow \text{null}$ | Decay of LasR protein    | $d_R R$                                                                                            |
| $r \rightarrow r + R$       | Translation of lasR mRNA | $k_r r$                                                                                            |
| $\text{null} \rightarrow r$ | Transcription of lasR    | $r_0 + V_r Z \left( \frac{1 - e^{-\beta V}}{K_{r1} + Z} + \frac{e^{-\beta V}}{K_{r2} + Z} \right)$ |
| $r \rightarrow \text{null}$ | Decay of lasR mRNA       | $d_r r$                                                                                            |
| $i \rightarrow i + I$       | Translation of lasI mRNA | $k_i i$                                                                                            |
| $I \rightarrow \text{null}$ | Decay of LasI protein    | $d_I I$                                                                                            |
| $\text{null} \rightarrow i$ | Transcription of lasI    | $i_0 + \frac{V_i Z}{K_i + Z}$                                                                      |
| $i \rightarrow \text{null}$ | Decay of lasI mRNA       | $d_i i$                                                                                            |
| $2P \rightarrow Z$          | Dimerization of P        | $k_Z P^2$                                                                                          |
| $Z \rightarrow 2P$          | Dissociation of Z        | $d_Z Z$                                                                                            |
| $R + Q_I \rightarrow F$     | Combination of R and QSI | $k_{RQ} R Q_I$                                                                                     |
| $F \rightarrow R + Q_I$     | Dissociation of F        | $d_F F$                                                                                            |
| $F \rightarrow Q$           | Degradation of R in F    | $d_R F$                                                                                            |
| $A \rightarrow \text{null}$ | Degradation of A by QQ   | $\eta(Q_Q) A$                                                                                      |

333 **Table 2.** Biochemical reactions in *P.aeruginosa* LasR/I circuit  
 334

335 The ordinary differential equations of the QS network are listed in equations 1 to 8.  
 336 Stationary QS components were solved using the steady state condition. When there are  
 337 multiple stable stationary solutions, the state with smallest concentrations was chosen as  
 338 the outcome presented in this work. The parameters of *P. aeruginosa* LasR/I QS circuit  
 339 were firstly estimated from reported values in the literature, then optimized to enable the  
 340 switching behaviour of the QS network observed in experiments (Supplementary Table  
 341 S1)<sup>34,35</sup>.

$$\begin{aligned} \frac{dA}{dt} &= \rho \frac{V_A I}{K_A + I} + \rho d_p P - \rho k_{RA} RA - d_A A - (1 - \rho) \eta(Q_Q) A & 1 \\ \frac{dR}{dt} &= k_r r + d_p P - k_{RA} RA - d_R R + d_F F - k_{RQ} R Q_I & 2 \\ \frac{dF}{dt} &= k_{RQ} R Q_I - d_F F - d_R F & 3 \\ \frac{dr}{dt} &= \frac{r_0}{v_b} + \frac{v_r Z}{v_b} \left( \frac{1 - e^{-\beta V}}{K_{r1} + Z} + \frac{e^{-\beta V}}{K_{r2} + Z} \right) - d_r r & 4 \\ \frac{dP}{dt} &= k_{RA} RA - d_p P + 2d_Z Z - 2k_Z P^2 & 5 \\ \frac{dZ}{dt} &= k_Z P^2 - d_Z Z & 6 \\ \frac{di}{dt} &= \frac{i_0}{v_b} + \frac{v_i Z}{v_b K_i + Z} - d_i i & 7 \\ \frac{dI}{dt} &= k_i i - d_I I & 8 \end{aligned}$$

342

343 **Reporter gene assay.** Stock solution of G1 was prepared by dissolving appropriate  
 344 amount of chemicals in DMSO to make final concentration of 10 mM, aliquoted into  
 345 small Appendorf tube and stored at -20°C until further usage. The compound was then  
 346 dissolved in ABTGC medium to the working concentration and 100 μL of this solution  
 347 was pipetted into first rows of 96-well microtiter dish (Nunc, Denmark). 2-fold serial  
 348 dilution was made to the rest of the rows, leaving last two rows empty for blank and  
 349 solvent control. Next, 50 μL of AiiA diluted in ABTGC media was added into each well.  
 350 Overnight culture of *P. aeruginosa* reporter strain PAO1-*lasB-gfp* was diluted to optical  
 351 density at 600 nm (OD<sub>600</sub>) of 0.02 (approximately 2.5 x 10<sup>8</sup> CFU/mL). 100 μL of the



352 bacterial suspension was added to each wells and the plate was incubated for 18 hours at  
353 37°C. GFP fluorescence (excitation at 485 nm, emission at 535 nm) and OD<sub>600</sub> readings  
354 were recorded every 15 mins using Tecan Infinite 200 Pro plate reader (Tecan Group Ltd,  
355 Männedorf, Switzerland). IC<sub>50</sub> values were calculated using Graphpad Prism 6 software.  
356 All assays were done in triplicate manner.

357 **Rhamnolipid quantification.** Rhamnolipid was extracted and quantified using method  
358 reported by Koch et al. with modifications<sup>53</sup>. Briefly, overnight culture of *P. aeruginosa*  
359 was diluted to OD<sub>600</sub> 0.01 in ABTGC medium. Into the cultures, compounds were added  
360 to appropriate concentration and the cultures were grown for 18 h at 37°C, shaking  
361 condition (200 rpm). Supernatants were collected and extracted with diethyl ether twice.  
362 The organic fractions were collected and concentrated to give white solids, which were  
363 further dissolved in water. 0.19% (w/v) orcinol in 50% H<sub>2</sub>SO<sub>4</sub> was freshly prepared and  
364 added into the water solution. It was then heated at 80°C for 20-30 min to give yellow-  
365 orange solution. The solution was allowed to cool at room temperature before measuring  
366 the absorbance at 421 nm. The results were normalized with cell density at OD<sub>600</sub>.  
367 Experiments were done in triplicate manner.

368

## 369 **References**

- 370 1 Hentzer, M. *et al.* Attenuation of *Pseudomonas aeruginosa* virulence by quorum  
371 sensing inhibitors. *EMBO J.* **22**, 3803-3815 (2003).
- 372 2 Fuqua, W. C., Winans, S. C. & Greenberg, E. P. Quorum sensing in bacteria: the  
373 LuxR-LuxI family of cell density-responsive transcriptional regulators. *J.*  
374 *Bacteriol.* **176**, 269-275 (1994).
- 375 3 Williams, P., Winzer, K., Chan, W. C. & Camara, M. Look who's talking:  
376 communication and quorum sensing in the bacterial world. *Phil. Trans. R. Soc. B*  
377 **362**, 1119-1134 (2007).
- 378 4 Whitehead, N. A., Barnard, A. M. L., Slater, H., Simpson, N. J. L. & Salmond, G.  
379 P. C. Quorum-sensing in Gram-negative bacteria. *FEMS Microbiol. Rev.* **25**, 365-  
380 404 (2001).

- 381 5 Grandclement, C., Tannieres, M., Morera, S., Dessaux, Y. & Faure, D. Quorum  
382 quenching: role in nature and applied developments. *FEMS Microbiol. Rev.* **40**,  
383 86-116 (2016).
- 384 6 Withers, H., Swift, S. & Williams, P. Quorum sensing as an integral component  
385 of gene regulatory networks in Gram-negative bacteria. *Curr. Opin. Microbiol.* **4**,  
386 186-193 (2001).
- 387 7 Fuqua, C., Parsek, M. R. & Greenberg, E. P. Regulation of gene expression by  
388 cell-to-cell communication: acyl-homoserine lactone quorum sensing. *Annu. Rev.*  
389 *Genet.* **35**, 439-468 (2001).
- 390 8 Brint, J. M. & Ohman, D. E. Synthesis of multiple exoproducts in *Pseudomonas*  
391 *aeruginosa* is under the control of RhlR-RhII, another set of regulators in strain  
392 PAO1 with homology to the autoinducer-responsive LuxR-LuxI family. *J.*  
393 *Bacteriol.* **177** (1995).
- 394 9 Pearson, J. P., Passadori, L., Iglewski, B. H. & Greenberg, E. P. A second N-  
395 acylhomoserine lactone signal produced by *Pseudomonas aeruginosa*. *Proc. Natl.*  
396 *Acad. Sci. USA* **92**, 1490-1494 (1995).
- 397 10 Pesci, E. C., Pearson, J. P., Seed, P. C. & Iglewski, B. H. Regulation of *las* and  
398 *rhl* quorum sensing in *Pseudomonas aeruginosa*. *J. Bacteriol.* **179**, 3127-3132  
399 (1997).
- 400 11 Schertzer, J. W., Boulette, M. L. & Whiteley, M. More than a signal: non-  
401 signaling properties of quorum sensing molecules. *Trends Microbiol.* **17**, 189-195  
402 (2009).
- 403 12 Hentzer, M. *et al.* Inhibition of quorum sensing in *Pseudomonas aeruginosa*  
404 biofilm bacteria by a halogenated furanone compound. *Microbiology* **148**, 87-102  
405 (2002).
- 406 13 Pearson, J. P., Feldman, M., Iglewski, B. H. & Prince, A. *Pseudomonas*  
407 *aeruginosa* cell-to-cell signaling is required for virulence in a model of acute  
408 pulmonary infection. *Infect. Immun.* **68**, 4331-4334 (2000).
- 409 14 Yeon, K.-M. *et al.* Quorum sensing: a new biofouling control paradigm in a  
410 membrane bioreactor for advanced wastewater treatment. *Environ. Sci. Technol.*  
411 **43**, 380-385 (2009).
- 412 15 Rasmussen, T. B. & Givskov, M. Quorum sensing inhibitors: a bargain of effects.  
413 *Microbiology* **152**, 895-904 (2006).
- 414 16 Zhang, L.-H. & Dong, Y.-H. Quorum sensing and signal interference: diverse  
415 implications. *Mol. Microbiol.* **53**, 1563-1571 (2004).
- 416 17 Parsek, M. R., Val, D. L., Hanzelka, B. L., John E. Cronan, J. & Greenberg, E. P.  
417 Acyl homoserine-lactone quorum-sensing signal generation. *Proc. Natl. Acad.*  
418 *Sci. USA* **96**, 4360-4365 (1999).
- 419 18 Dong, Y.-H. *et al.* Quenching quorum-sensing-dependent bacterial infection by an  
420 N-acyl homoserine lactonase. *Nature* **144**, 813-817 (2001).
- 421 19 Dong, Y.-H., Wang, L.-H. & Zhang, L.-H. Quorum-quenching microbial  
422 infections: mechanisms and implications. *Phil. Trans. R. Soc. B* **362**, 1201-1211  
423 (2007).
- 424 20 Barbarossa, M. V. & Kuttler, C. Mathematical modeling of bacteria  
425 communication in continuous cultures. *Appl. Sci.* **6**, 149 (2016).

- 426 21 Dockery, J. D. & Keener, J. P. A mathematical model for quorum sensing in  
427 *Pseudomonas aeruginosa*. *Bull. Math. Biol.* **63**, 95-116 (2001).
- 428 22 Fagerlind, M. G. *et al.* The role of regulators in the expression of quorum-sensing  
429 signals in *Pseudomonas aeruginosa*. *J. Mol. Microbiol. Biotechnol.* **6**, 88-100  
430 (2003).
- 431 23 Goryachev, A., Toh, D. & Lee, T. Systems analysis of a quorum sensing network:  
432 design constraints imposed by the functional requirements, network topology and  
433 kinetic constants. *Biosystems* **83**, 178-187 (2006).
- 434 24 Weber, M. & Buceta, J. Dynamics of the quorum sensing switch: stochastic and  
435 non-stationary effects. *BMC systems biology* **7**, 6 (2013).
- 436 25 Engbrecht, J. & Silverman, M. Identification of genes and gene products  
437 necessary for bacterial bioluminescence. *Proc. Natl. Acad. Sci. USA* **81**, 4154-  
438 4158 (1984).
- 439 26 Ng, W.-L. & Bassler, B. L. Bacterial quorum-sensing network architectures.  
440 *Annu. Rev. Genet.* **43**, 197-222, doi:10.1146/annurev-genet-102108-134304  
441 (2009).
- 442 27 Jensen, V. *et al.* RhlR expression in *Pseudomonas aeruginosa* is modulated by the  
443 *Pseudomonas* Quinolone Signal via PhoB-dependent and -independent pathways.  
444 *J. Bacteriol.* **188**, 8601-8606 (2006).
- 445 28 Lee, J. *et al.* A cell-cell communication signal integrates quorum sensing and  
446 stress response. *Nat. Chem. Biol.* **9**, 339-343 (2013).
- 447 29 Dickey, S. W., Cheung, G. Y. C. & Otto, M. Different drugs for bad bugs:  
448 antivirulence strategies in the age of antibiotic resistance. *Nat. Rev. Drug Discov.*  
449 **advance online publication**, doi:10.1038/nrd.2017.23 (2017).
- 450 30 Chen, F., Gao, Y., Chen, X., Yu, Z. & Li, X. Quorum quenching enzymes and  
451 their application in degrading signal molecules to block quorum sensing-  
452 dependent infection *Int. J. Mol. Sci.* **14**, 17477-17500 (2013).
- 453 31 Tan, S. Y.-Y. *et al.* Identification of five structurally unrelated quorum-sensing  
454 inhibitors of *Pseudomonas aeruginosa* from a natural-derivative database.  
455 *Antimicrob. Agents Chemother.* **57**, 5629-5641 (2013).
- 456 32 Melke, P., Sahlin, P., Levchenko, A. & Jönsson, H. A cell- based model for  
457 quorum sensing in heterogeneous bacterial colonies. *PLoS Comput. Biol.* **6**,  
458 e1000819 (2010).
- 459 33 Goryachev, A. B., Toh, D. J. & Lee, T. Systems analysis of a quorum sensing  
460 network: Design constraints imposed by the functional requirements, network  
461 topology and kinetic constants. *Biosystems* **83**, 178-187 (2006).
- 462 34 Pérez, P. D. & Hagen, S. J. Heterogeneous response to a quorum-sensing signal in  
463 the luminescence of individual *Vibrio fischeri*. *PLoS ONE* **5**, e15473 (2010).
- 464 35 Papenfort, K. & Bassler, B. L. Quorum sensing signal-response systems in Gram-  
465 negative bacteria. *Nat. Rev. Microbiol.* **14**, 576-588 (2016).
- 466 36 Manefield, M. *et al.* Halogenated furanones inhibit quorum sensing through  
467 accelerated LuxR turnover. *Microbiology* **148**, 1119-1127 (2002).
- 468 37 Loewe, S. The problem of synergism and antagonism of combined drugs.  
469 *Arzneimittel-Forschung* **3**, 285-290 (1953).
- 470 38 Cornish-Bowden, A. & Cornish-Bowden, A. Fundamentals of enzyme kinetics.  
471 (2012).

- 472 39 Rasmussen, T. B. *et al.* Screening for quorum-sensing inhibitors (QSI) by use of a  
473 novel genetic system, the QSI selector. *J. Bacteriol.* **187**, 1799-1814 (2005).
- 474 40 Pearson, J. P., Pesci, E. C. & Iglewski, B. H. Roles of *Pseudomonas aeruginosa*  
475 Las and Rhl quorum-sensing systems in control of elastase and rhamnolipid  
476 biosynthesis genes. *J. Bacteriol.* **179**, 5756-5767 (1997).
- 477 41 Wade, D. S. *et al.* Regulation of *Pseudomonas* quinolone signal synthesis in  
478 *Pseudomonas aeruginosa*. *J. Bacteriol.* **187**, 4372-4380 (2005).
- 479 42 Diggle, S. P. *et al.* The *Pseudomonas aeruginosa* 4-quinolone signal molecules  
480 HHQ and PQS play multifunctional roles in quorum sensing and iron entrapment.  
481 *Cell Chem. Biol.* **14**, 87-96 (2007).
- 482 43 Diggle, S. P. *et al.* The *Pseudomonas aeruginosa* quinolone signal molecule  
483 overcomes the cell density-dependency of the quorum sensing hierarchy,  
484 regulates rhl-dependent genes at the onset of stationary phase and can be  
485 produced in the absence of LasR. *Mol. Microbiol.* **50**, 29-43 (2003).
- 486 44 Collier, D. N. *et al.* A bacterial cell to cell signal in the lungs of cystic fibrosis  
487 patients. *FEMS Microbiol. Lett.* **215**, 41-46 (2002).
- 488 45 Kim, K. *et al.* HHQ and PQS, two *Pseudomonas aeruginosa* quorum-sensing  
489 molecules, down-regulate the innate immune responses through the nuclear  
490 factor- $\kappa$ B pathway. *Immunology* **129**, 578-588 (2010).
- 491 46 Déziel, E. *et al.* Analysis of *Pseudomonas aeruginosa* 4-hydroxy-2-  
492 alkylquinolines (HAQs) reveals a role for 4-hydroxy-2- heptylquinoline in cell-to-  
493 cell communication. *Proc. Natl. Acad. Sci. USA* **101**, 1339-1344 (2004).
- 494 47 Medina, G., Juarez, K., Valderrama, B. & Soberon-Chavez, G. Mechanism of  
495 *Pseudomonas aeruginosa* RhlR transcriptional regulation of the *rhlAB* promoter.  
496 *J. Bacteriol.* **185**, 5976-5983 (2003).
- 497 48 Wang, L.-H., Weng, L.-X., Dong, Y.-H. & Zhang, L.-H. Specificity and enzyme  
498 kinetics of the quorum-quenching N-Acyl homoserine lactone lactonase (AHL-  
499 lactonase). *J. Biol. Chem.* **279**, 13645-13651 (2004).
- 500 49 Zulianello, L. *et al.* Rhamnolipids are virulence factors that promote early  
501 infiltration of primary human airway epithelia by *Pseudomonas aeruginosa*.  
502 *Infect. Immun.* **74**, 3134-3147 (2006).
- 503 50 Jensen, P. Ø. *et al.* Rapid necrotic killing of polymorphonuclear leukocytes is  
504 caused by quorum-sensing-controlled production of rhamnolipid by *Pseudomonas*  
505 *aeruginosa*. *Microbiology* **153**, 1329-1338 (2007).
- 506 51 Glick, R. *et al.* Increase in rhamnolipid synthesis under iron-limiting conditions  
507 influences surface motility and biofilm formation in *Pseudomonas aeruginosa*. *J.*  
508 *Bacteriol.* **192**, 2973-2980 (2010).
- 509 52 Pamp, S. J. & Tolker-Nielsen, T. Multiple roles of biosurfactants in structural  
510 biofilm development by *Pseudomonas aeruginosa*. *J. Bacteriol.* **189**, 2531-2539  
511 (2007).
- 512 53 Koch, A. K., Kappeli, O., Fiechter, A. & Reiser, J. Hydrocarbon assimilation and  
513 biosurfactant production in *Pseudomonas aeruginosa* mutants. *J. Bacteriol.* **173**,  
514 4212-4219 (1991).
- 515 54 Ozbudak, E. M., Thattai, M., Lim, H. N., Shraiman, B. I. & Oudenaarden, A. v.  
516 Multistability in the lactose utilization network of *Escherichia coli*. *Nature* **427**,  
517 737-740 (2004).

- 518 55 Preston, M. J. *et al.* Contribution of proteases and LasR to the virulence of  
519 *Pseudomonas aeruginosa* during corneal infections. *Infect. Immun.* **65**, 3086-3090  
520 (1997).
- 521 56 Cabrol, S., Olliver, A., Pier, G. B., Andremont, A. & Ruimy, R. Transcription of  
522 quorum-sensing system genes in clinical and environmental isolates of  
523 *Pseudomonas aeruginosa*. *J. Bacteriol.* **185**, 7222-7230 (2003).
- 524 57 Marvig, R. L., Sommer, L. M., Molin, S. & Johansen, H. K. Convergent evolution  
525 and adaptation of *Pseudomonas aeruginosa* within patients with cystic fibrosis.  
526 *Nat. Genet.* **47**, 1-9 (2014).
- 527 58 Hamood, A. N., Griswold, J. & Colmer, J. Characterization of elastase-deficient  
528 clinical isolates of *Pseudomonas aeruginosa*. *Infect. Immun.* **64**, 3154-3160  
529 (1996).
- 530 59 Dekimpe, V. & Deziel, E. Revisiting the quorum-sensing hierarchy in  
531 *Pseudomonas aeruginosa*: the transcriptional regulator RhlR regulates LasR-  
532 specific factors. *Microbiology* **155**, 712-723 (2009).
- 533 60 Limmer, S. *et al.* *Pseudomonas aeruginosa* RhlR is required to neutralize the  
534 cellular immune response in a *Drosophila melanogaster* oral infection model.  
535 *Proc. Natl. Acad. Sci. USA* **108**, 17378-17383 (2011).
- 536 61 Mukherjee, S., Moustafa, D., Smith, C. D., Goldberg, J. B. & Bassler, B. L. The  
537 RhlR quorum-sensing receptor controls *Pseudomonas aeruginosa* pathogenesis  
538 and biofilm development independently of its canonical homoserine lactone  
539 autoinducer. *PLoS Pathog.* **13**, e1006504 (2017).
- 540 62 Fong, J. *et al.* Disulfide bond-containing ajoene analogues as novel quorum  
541 sensing inhibitors of *Pseudomonas aeruginosa*. *J. Med. Chem.* **60**, 215-227  
542 (2017).
- 543 63 Yang, L. *et al.* Effects of iron on DNA release and biofilm development by  
544 *Pseudomonas aeruginosa*. *Microbiology* **153**, 1318-1328 (2007).
- 545 64 Hentzer, M. *et al.* Attenuation of *Pseudomonas aeruginosa* virulence by quorum  
546 sensing inhibitors. *EMBO J.* **22**, 3803-3815 (2003).
- 547 65 Hansen, S. K. *et al.* Evolution and diversification of *Pseudomonas aeruginosa* in  
548 the paranasal sinuses of cystic fibrosis children have implications for chronic lung  
549 infection. *ISME J.* **6**, 31-45 (2012).
- 550 66 Fan, H. *et al.* QsIA disrupts LasR dimerization in antiactivation of bacterial  
551 quorum sensing. *Proc. Natl. Acad. Sci. USA* **110**, 20765-20770 (2013).
- 552 67 Kaplan, H. B. & Greenberg, E. P. Diffusion of autoinducer is involved in  
553 regulation of the *Vibrio fischeri* luminescence system. *J. Bacteriol.* **163**, 1210-  
554 1214 (1985).
- 555 68 Kaufmann, G. F. *et al.* Revisiting quorum sensing: discovery of additional  
556 chemical and biological functions for 3-oxo-N-acylhomoserine lactones. *Proc.*  
557 *Natl. Acad. Sci. USA* **102**, 309-314 (2005).
- 558

559

560

561 **Acknowledgements**

562 This research was supported by the National Research Foundation and Ministry of  
563 Education Singapore under its Research Centre of Excellence Program  
564 (SCELSE) and AcRF Tier 2 (MOE2016-T2-1-010) from Ministry of Education,  
565 Singapore.

566

567 **Author Contributions**

568 H.B.S., B.W. and L.Y. designed methods and experiments. C.Z., R.Y. and J.F. carried out  
569 the laboratory experiments, analyzed the data, and interpreted the results. L.Y. and M.G.  
570 discussed analyses, interpretation, and presentation. J.F., C.Z., and L.Y. wrote the paper.  
571 All authors have contributed to, seen, and approved the manuscript.

572

573 **Additional Information**

574 All data generated or analysed during this study are included in this published article and  
575 its Supplementary Information files.

576 The authors declare no competing financial interests.

577

578 **Figures:**

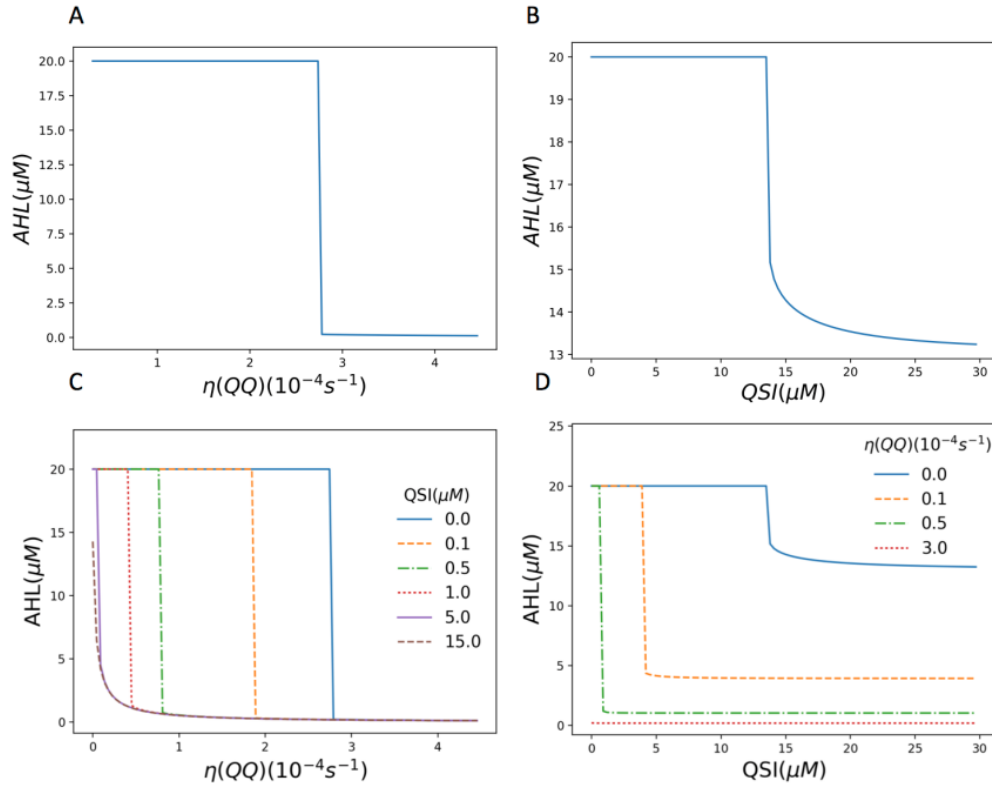

579

580 **Figure 1.** Simulation results of stationary AHL concentration to QQ and QSI. (A)  $\eta(QQ)$ ,  
581 (B) QSI, (C)  $\eta(QQ)$  at different QSI concentrations, and (D) QSI at different  $\eta(QQ)$   
582 values.

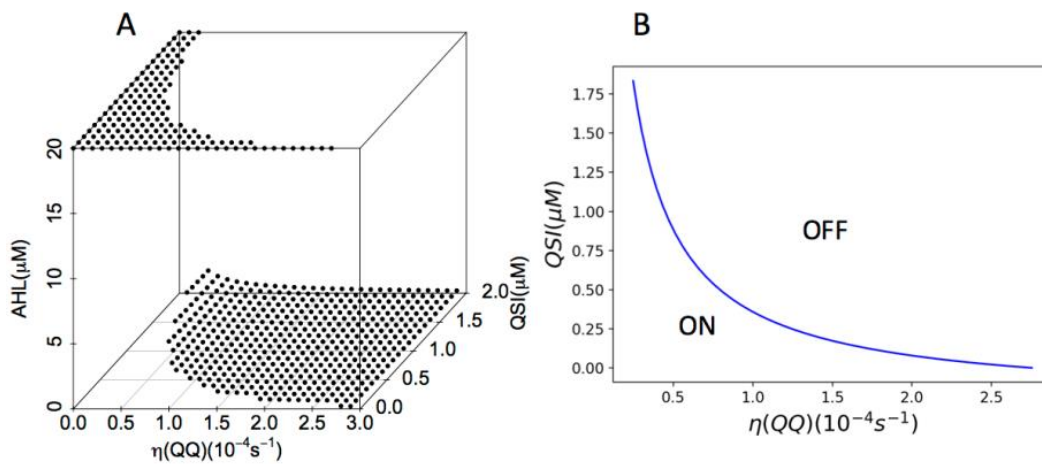

583

584 **Figure 2.** Simulation QS states to QQ and QSI. (A) 3D stationary AHL concentration to  
585  $\eta$ (QQ) and QSI, (B) 2D map of QS on and off states to  $\eta$ (QQ) and QSI.

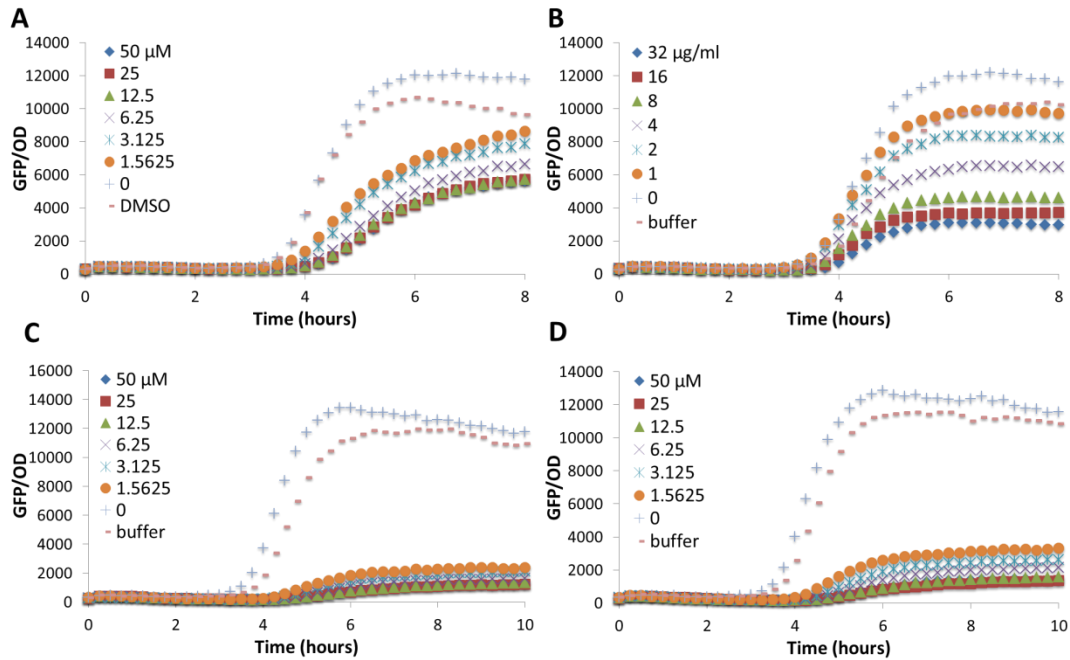

586

587 **Figure 3.** Dose-dependent curves of compounds with QS reporter strain PAO1-*lasB-gfp*.

588 (A) G1, (B) AiiA, (C) G1 and AiiA at 32  $\mu\text{g/mL}$ , and (D) G1 and AiiA at 16  $\mu\text{g/mL}$ .

589 Experiments were done in triplicate manner, only representative data are shown.

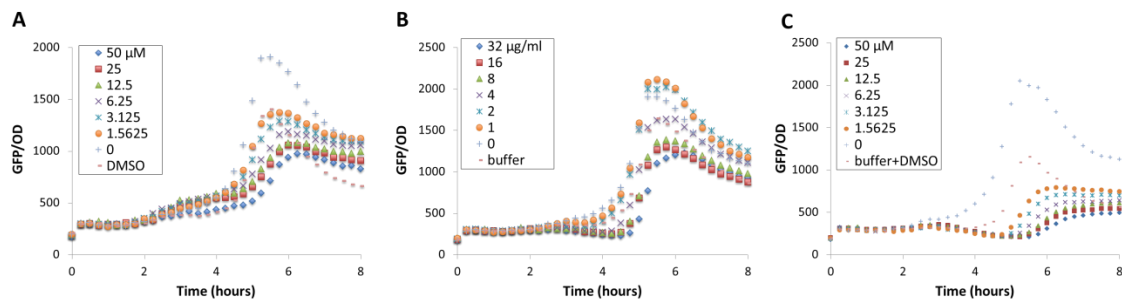

590

591 **Figure 4.** Dose-dependent curves of compounds with QS reporter strain PAO1-*pqsA-gfp*.

592 (A) G1, (B) AiiA, (C) G1 and AiiA at 32  $\mu\text{g/mL}$ . Experiments were done in triplicate

593 manner, only representative data are shown.



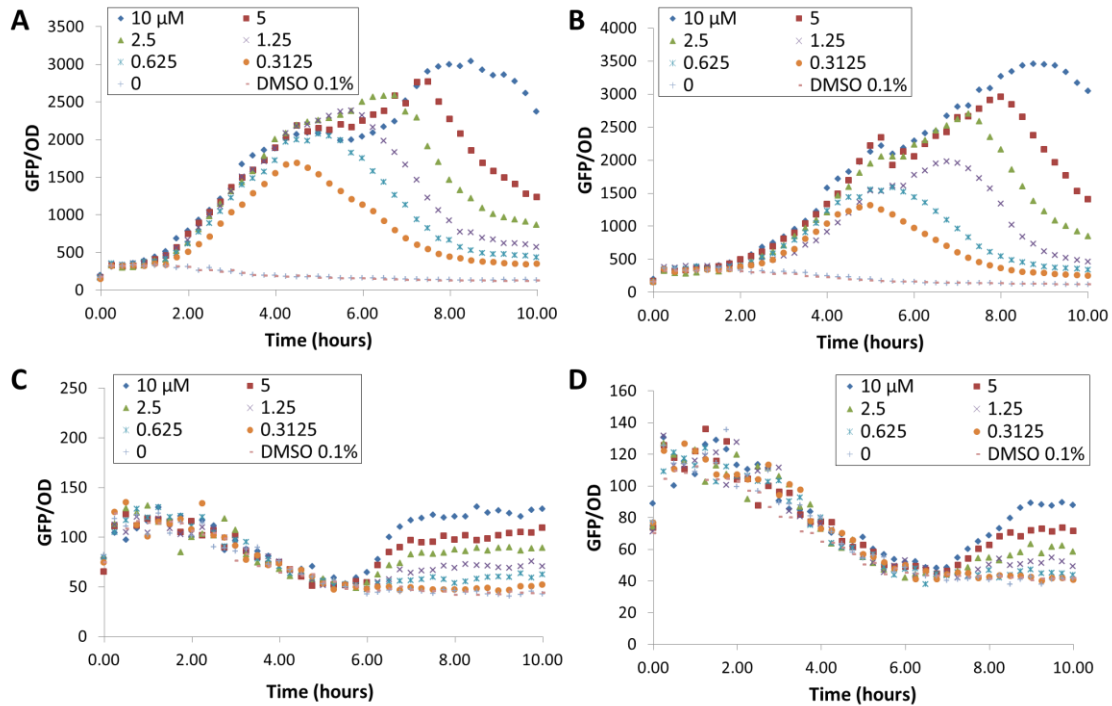

594

595 **Figure 5.** Dose-dependent curves of QS deficient  $\Delta lasI\Delta rhII$  double mutant harboring  
596 *lasB-gfp* (top) and *rhIA-gfp* (bottom) supplemented with (A) 3-oxo-C12-HSL, (B) 3-oxo-  
597 C12-HSL with G1 50  $\mu\text{M}$ , (C) C4-HSL, and (D) C4-HSL with G1 50  $\mu\text{M}$ . Experiments  
598 were done in triplicate manner, only representative data are shown.

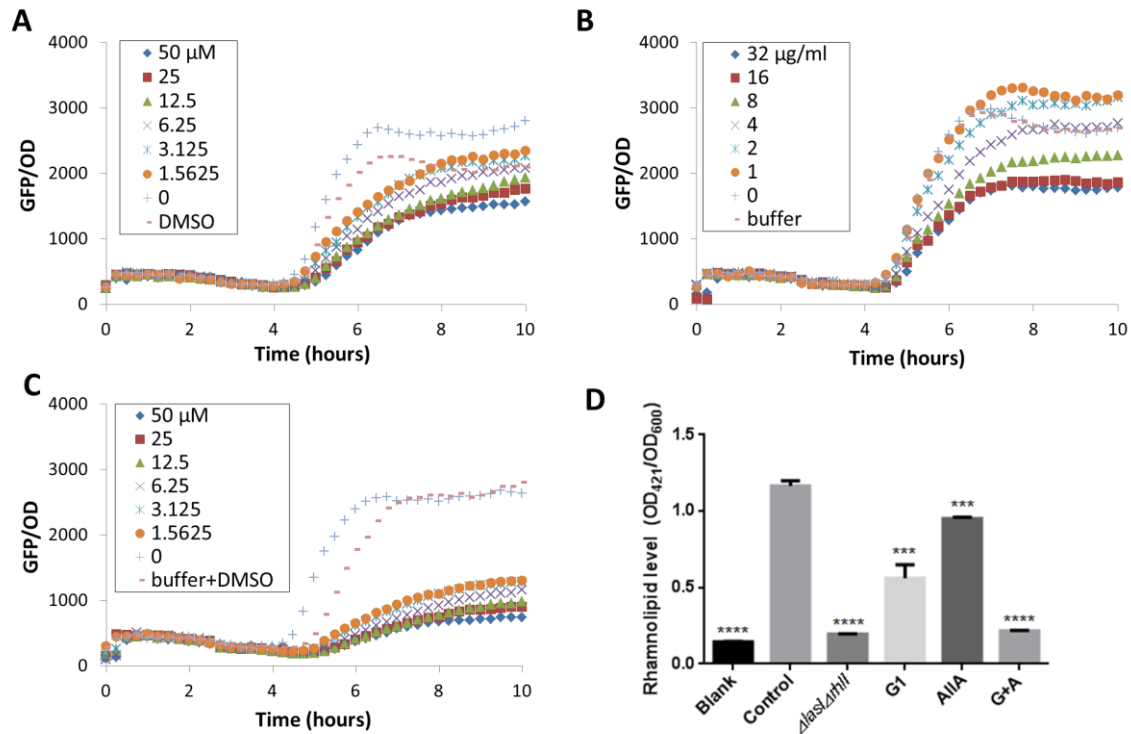

599

600 **Figure 6.** Effects of QQ and QSI on the *rhl* system. Dose-dependent curves of  
601 compounds with QS reporter strain PAO1-*rhlA-gfp* (A) G1, (B) AiiA, (C) G1 and AiiA at  
602 32  $\mu$ g/mL. (D) Effects on rhamnolipid production when tested at final concentration of 50  
603  $\mu$ M (for G1), and 32  $\mu$ g/mL (for AiiA). Same amount of DMSO and buffer were used as  
604 positive control. PAO1  $\Delta$ lasI $\Delta$ rhlI was used as negative control. Experiments were done  
605 in triplicate manner. Error bars are means  $\pm$  SDs. \*\*\* =  $p < 0.001$ . \*\*\*\* =  $p < 0.0001$ ,  
606 Student's t test.

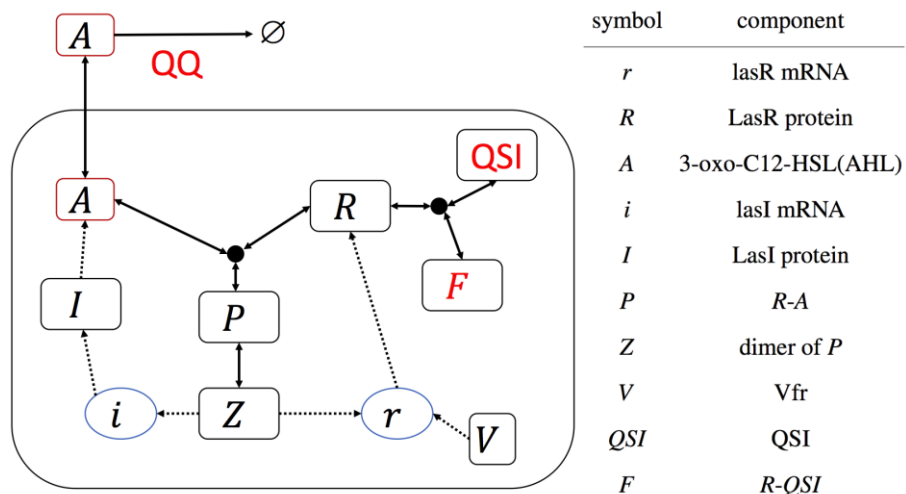

607

608 **Figure 7.** *P.aeruginosa* LasR/I circuit model with QQ and QSI both indicated in red.

609 Dashed lines indicate the reactants still remains after the reactions and solid lines indicate

610 the reactants will disappear after the reactions.

611

612
